# Supplementary material for: Behavioral study of flexible platinum counter electrodes under alternative bending conditions
Source: Royal Society of Chemistry journal article supplement (doi:10.1039/c5ra13256h), 2015-01-01
Supplement: c5ra13256h1.pdf [file c5ra13256h1.pdf]

## Supplementary Information

*for*

### **Behavior study of flexible platinum counter electrodes under alternative bending conditions†**

Xue-Long He,<sup>a,b</sup> Ruo-Xi Shen,<sup>b</sup> Chang-Jiu Li,<sup>b</sup> Baizeng Fang<sup>\*,c</sup> and Guan-Jun Yang<sup>b,\*</sup>

<sup>a</sup> Jiangxi Province Key Laboratory of Precision Drive and Control, Nanchang 330099, PR China

<sup>b</sup> State Key Laboratory for Mechanical Behavior of Materials, School of Materials Science and Engineering, Xi'an Jiaotong University, Xi'an, Shaanxi, 710049, PR China.

Email: [ygj@mail.xjtu.edu.cn](mailto:ygj@mail.xjtu.edu.cn); Tel.: +86-29-82665299

<sup>c</sup> Department of Chemical & Biological Engineering, University of British Columbia, 2360 East Mall, Vancouver, BC, Canada V6T 1Z3. Email: [bfang@chbe.ubc.ca](mailto:bfang@chbe.ubc.ca)

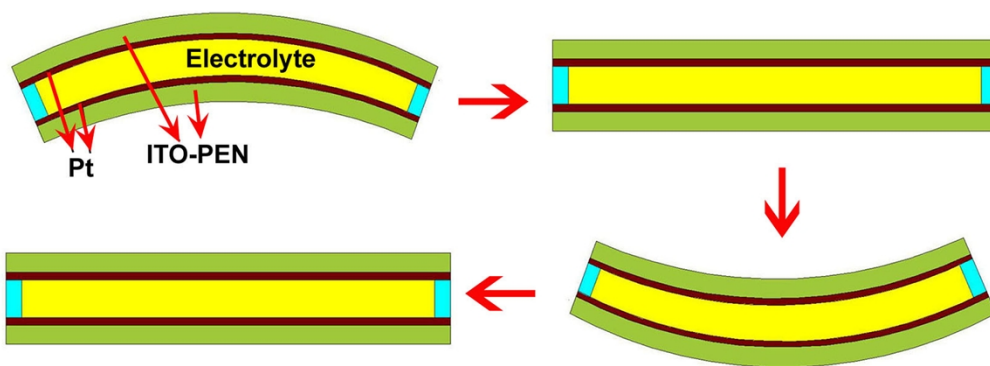

**Fig. S1** Schematic of the flexible Pt CE undergoes a bending cycle of alternating bending mode.

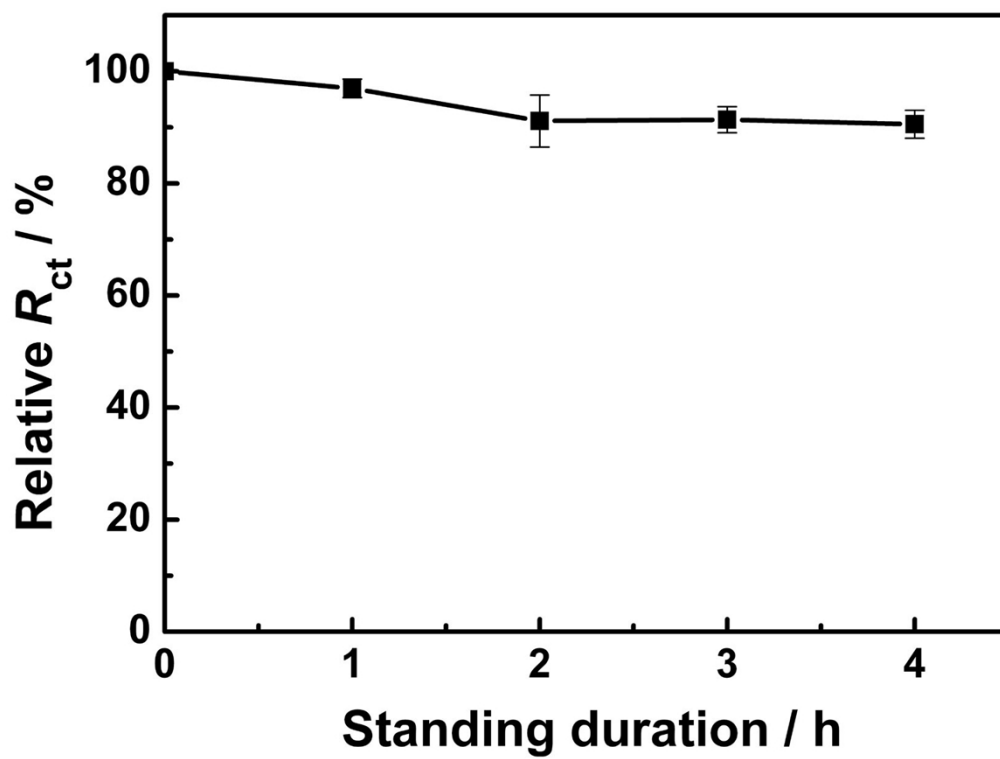

Fig. S2 Relative  $R_{ct}$  value of the Pt CE shown against the standing duration.
